# Supplementary material for: Development of photoperiod- and thermo-sensitive male sterility rice expressing transgene Bacillus thuringiensis
Source: PubMed Central journal article supplement — Breed Sci. 2015 Sep 1;65(4):333–9. doi: 10.1270/jsbbs.65.333 (PMC4542934; doi:10.1270/jsbbs.65.333), 2015-09-01
Supplement: 65_333_1.pdf [file 65_333_1.pdf]

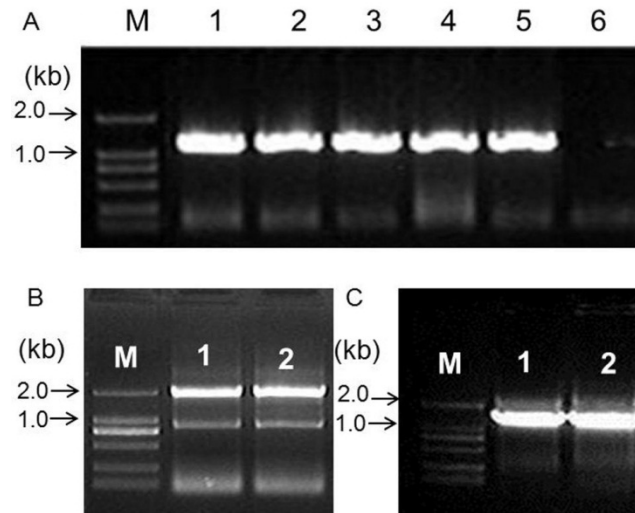

**Supplemental Fig. 1.** PCR detection of *cryIAb/lac* gene in 208S and its hybrids. (A) PCR detection results of *cryIAb/lac* gene. Lanes 1-6: 208S, Zheyou 1, Zheyou 3, Zheyou 5, Huahui 1 (the positive control) and Minghui 63 (the negative control). (B) PCR detection results for 5' flanking sequencing fragments of *cryIAb/lac* gene insertion, lanes 1-3: DNA Marker, 208S, Huahui 1. (C) 3' flanking sequencing fragments, lanes 1-3: DNA Marker, 208S, Huahui 1.
