# Supplementary material for: Development of photoperiod- and thermo-sensitive male sterility rice expressing transgene Bacillus thuringiensis
Source: PubMed Central journal article supplement — Breed Sci. 2015 Sep 1;65(4):333–9. doi: 10.1270/jsbbs.65.333 (PMC4542934; doi:10.1270/jsbbs.65.333), 2015-09-01
Supplement: 65_333_2.pdf [file 65_333_2.pdf]

Supplemental Table 1. Agronomic traits of 208S (Hangzhou, China, 2010)

| Sowing date | Heading date (days) | No. of leaves per plant | Plant height (cm) | No. of tillers per plant | No. of grains per panicle |
|-------------|---------------------|-------------------------|-------------------|--------------------------|---------------------------|
| May 7th     | 112.0               | 16.7                    | NA                | NA                       | NA                        |
| May 16th    | 104.0**             | 16.9                    | 111.0             | 10.1                     | 181.0                     |
| May 22th    | 105.0**             | 16.3                    | NA                | NA                       | NA                        |
| May 28th    | 100.0**             | 16.0                    | NA                | NA                       | NA                        |

<sup>a</sup> \*\*Significant at the 0.01 probability level.

<sup>b</sup> Standard error of the mean for 10 plants.

<sup>c</sup> NA, not available.

Supplemental Table 2. Quality traits performance of 208S and its hybrid (Hangzhou, China, 2010)

| Lines               | Brown rice<br>rate (%) | Milling rice<br>rate (%) | Head rice<br>rate (%) | length-width<br>ratio | Chalkiness<br>rate (%) | ASV     | GC<br>(mm) | AC (%)    | Protein<br>content (%) |
|---------------------|------------------------|--------------------------|-----------------------|-----------------------|------------------------|---------|------------|-----------|------------------------|
| First grade quality | ≥77.0                  | ≥69.0                    | ≥55.0                 | ≥2.8                  | ≤ 10.0                 | 6.0-7.0 | ≥70.0      | 17.0-22.0 | ≥10.0                  |
| Guangzhan63S (CK)   | 79.6                   | 71.6                     | 54.1                  | 2.9                   | 30.0                   | 6.4     | 71.5       | 17.1      | 9.5                    |
| 208S                | 80.7                   | 71.2                     | 65.3**                | 3.0                   | 2.0***                 | 7.0     | 86.0**     | 12.5**    | 13.8**                 |
| Zheyong 3           | 81.0                   | 71.4                     | 62.9*                 | 3.0                   | 10.0***                | 7.0     | 88.0**     | 14.8**    | 11.1*                  |

<sup>a</sup> \*Significant at the 0.05 probability level. \*\*Significant at the 0.01 probability level. \*\*\*Significant at the 0.001 probability level.
